# Supplementary material
Source: PubMed Central journal article supplement (PMC7489253)

CCL17

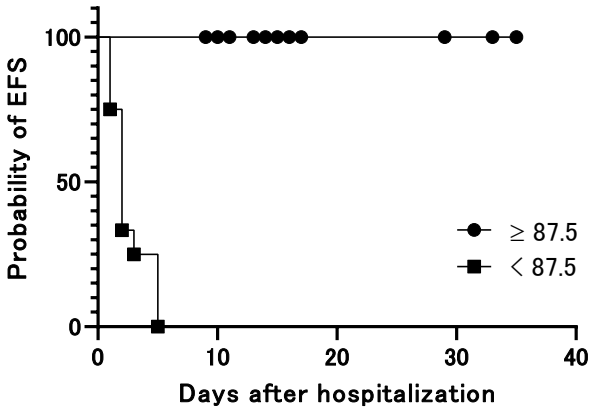

IFN- $\lambda$ 3

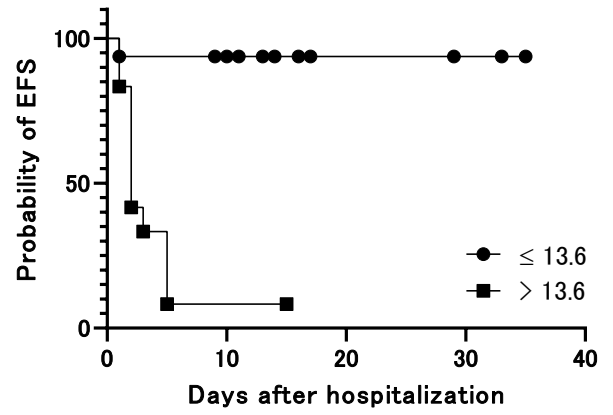

IP-10

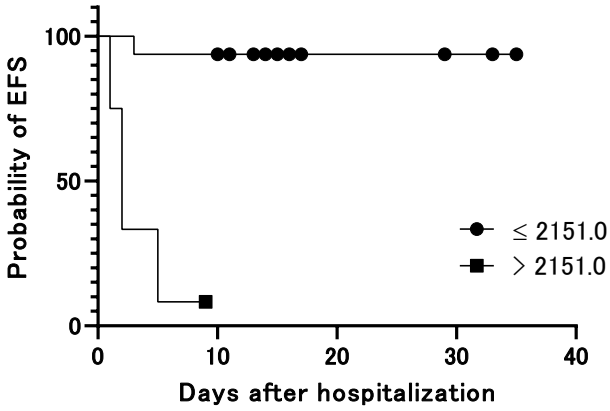

IL-6

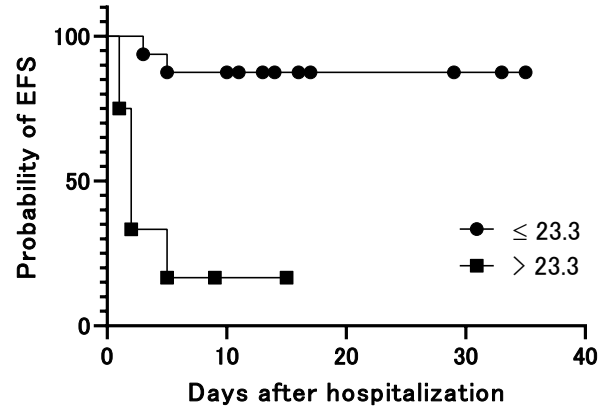

CXCL9

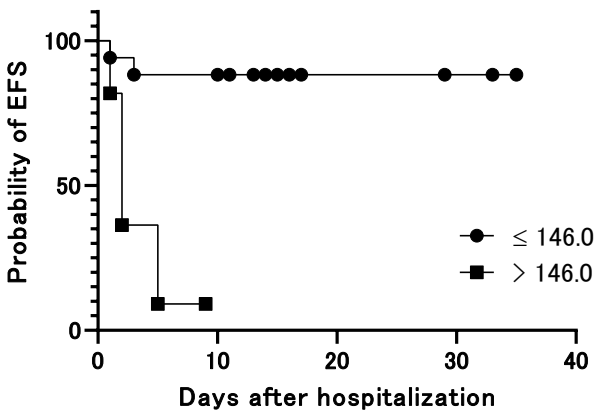

Supplemental Figure 1

Albumin

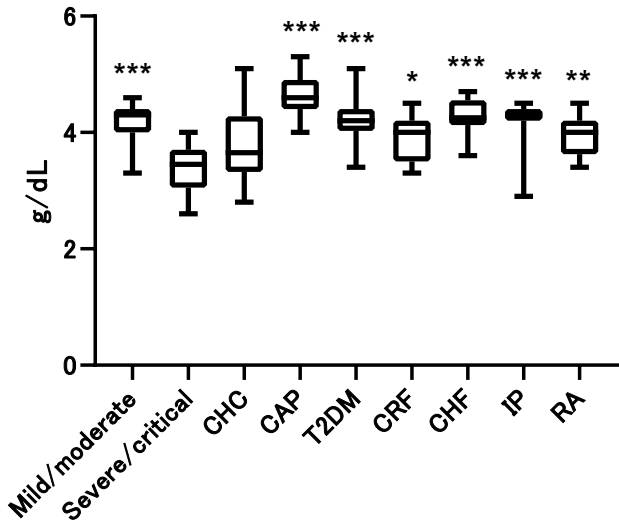

Neutrophils

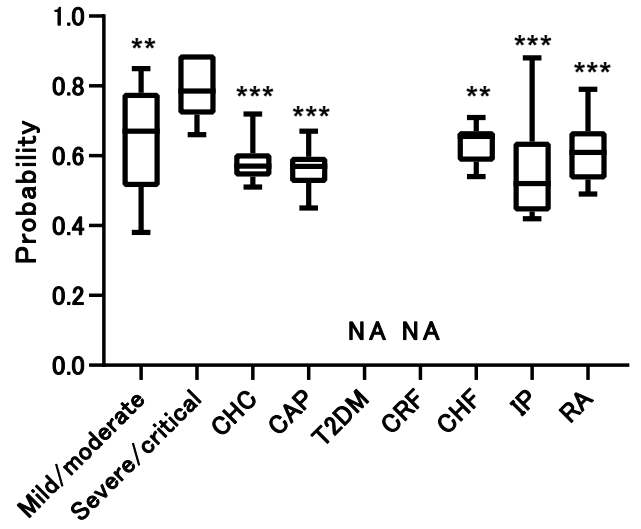

LDH

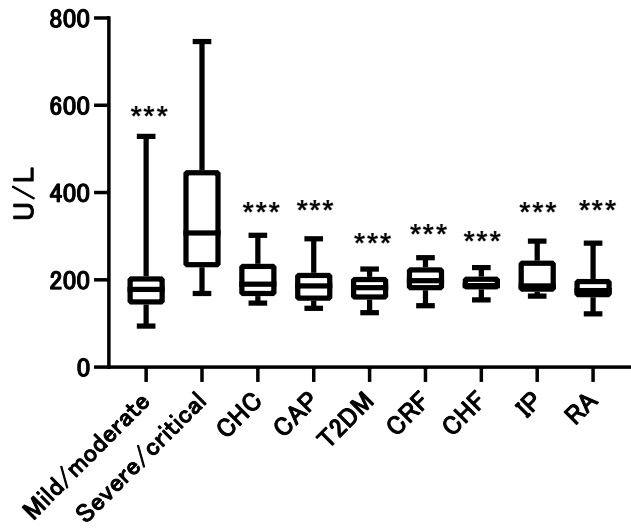

CRP

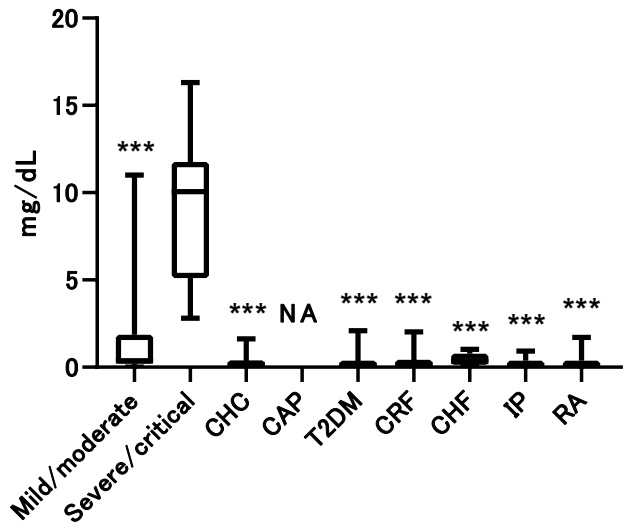

Supplement: mmc1.pdf [file mmc1.pdf]
